# Supplementary material for: Exploiting and assessing multi-source data for supervised biomedical named entity recognition
Source: PubMed Central journal article supplement (PMC6041968; doi:10.1093/bioinformatics/bty152), 2018-03-10
Supplement: bty152_supp-info-exploiting.pdf [file bty152_supp-info-exploiting.pdf]

## Supplementary Information

### Supplementary Methods

#### FORMAT CONVERSION AND ANNOTATION CORRECTION

CRF-based models are the most widely adopted and documented approaches in end-to-end biomedical NER tools, thus for comparative purposes, we adopted the approach. Stanfords NER module (Finkel et al., 2005) was used to train a CRF model, requiring training data in IOB2 format, where the initial token in multi-term entity is labeled as B-LABEL (B for “Beginning”), and internal tokens following the B-LABEL are labeled as I-LABEL (I for “Inside”) (Krishnan and Ganapathy, 2005). All other null tokens are labeled as “O”. However, while required for training, such format is tokenization-dependent and loses article information, if this is required for further validation and transparency. To retain all annotation information from the original corpus, such as: document source, passage and annotation position, selected corpora in the BRAT format were initially converted to the BioC format standard (Comeau et al., 2013) using the available Brat2BioC Java module (Yepes et al., 2013). The provided annotation indices were in turn checked for errors: an offset/mismatch between 1-5 characters was corrected automatically, while larger offsets were manually validated and corrected.

Corrected and BioC-converted corpora were finally converted to IOB2 using a custom python script and the python pyBioC library (Marques and Rinaldi, 2013). Unless a custom DTD (Document Type Definition) was used and provided by the corpus (as for tmVar corpus (Wei et al., 2013)), the default DTD was used to process BioC documents. As part of the conversion, following sentence tokenization, word tokenization was carried out using the NLTK regular expression tokenizer with the expression: “\w+|[\S\w]”. This was chosen over other python NLTK tokenization methods as ‘TreebankTokenizer’, ‘WordPunctTokenizer’, ‘PunktWordTokenizer’, and ‘WhitespaceTokenizer’ as these contract some (or all) of the punctuation, creating a token with embedded punctuation which does not match the entity/annotation when the annotation is part of a punctuated token. For example: “[...] gene X-associated [...]” tokenizes to “gene” and “X-associated” using “TreebankWordTokenizer” and “PunktWordTokenizer”, however the gene entity in this case is only “X” or “gene X”. In the case of a terminal entity (e.g. “[...] gene X.”), the punctuation is contracted using the “PunktWordTokenizer”.

#### MODEL TRAINING AND PREDICTION

A python wrapper was developed to train and predict data using the Stanford Core NLP Java toolbox, by executing the following shell commands:

**Training:** javacp stanford-ner.jar;lib/\*;. edu.stanford.nlp.ie.crf.CRFClassifier prop train-PropFile

**Prediction:** javacp stanford-ner.jar;lib/\*;. edu.stanford.nlp.ie.crf.CRFClassifier -loadClassifier trainedModel prop testPropFile

Training and test data are provided through a file list in the properties file (.prop file). The train and test prop files are modified and populated prior to running the model by inserting the list of train and test files. Alternatively, train and test files can be inputted as an argument to the command line, however given that this is limited by the number of

characters in the input shell command (imposed by the operating system used), and the number of files used for training exceeded such limit, we opted for the modification of the .prop file.

Table S1: List of compiled biomedical corpora, their original format, year of publication, and size of data. Number of documents for each corpus may vary based on the source, and a document unit may be defined differently in different corpora (e.g. abstract, title, whole manuscript text). The sources from which these each of these are available and were originally obtained are provided on: [https://github.com/dterg/biomedical\\_corpora/wiki](https://github.com/dterg/biomedical_corpora/wiki) and <https://bitbucket.org/iAnalytica/bioner>, where sources may be the original manuscript published, or if not available (or available in a different formation), other secondary sources hosting the resource. When a corpus is available in various formats and multiple sources, these are indicated.

| Corpus                                         | Year | Format          | Documents                                                                                                                        |
|------------------------------------------------|------|-----------------|----------------------------------------------------------------------------------------------------------------------------------|
| Ab3P (Abbreviation Plus Precision)             | 2008 | BioC            | 1250 PubMed Abstracts                                                                                                            |
| AIMed                                          | 2005 | BioC            | ~ 1000 MEDLINE abstracts (200 abstracts)                                                                                         |
| AnatEM (Anatomical entity mention recognition) | 2013 | CONLL, standoff | 1212 docs (500 docs from AnEM + 262 from MLEE + 450 others)                                                                      |
| AnEM                                           | 2012 | BioC            | 500 docs (PubMed and PMC); abstracts and full text drawn randomly                                                                |
| AZDC (Arizona Disease Corpus)                  | 2009 | IeXML, .txt     | 2856 PubMed abstracts (2775 sentences). Other source says 794 PubMed Abstracts                                                   |
| BEL (BioCreative V5 BEL Track)                 | 2016 | BioC            |                                                                                                                                  |
| BioADI                                         | 2009 | BioC            | 1201 PubMed abstracts                                                                                                            |
| BioCause                                       | 2013 | standoff        | 19 full-text documents                                                                                                           |
| BioCreative-PPI                                |      | XML             |                                                                                                                                  |
| BioGRID                                        | 2017 | BioC            | 120 full text articles                                                                                                           |
| BioInfer                                       | 2007 | BioC            | 1100 sentences from biomedical literature                                                                                        |
| BioMedLat                                      | 2016 | standoff        | 643 BioASQ questions/factoids                                                                                                    |
| BioText                                        | 2004 | txt             | 100 titles and 40 abstracts                                                                                                      |
| CDR (BioCreative V)                            |      | BioC            |                                                                                                                                  |
| CellFinder 1.0                                 | 2012 | BioC            | 10 full documents from PMC from (Loser et al. 2009) on "Human Embryonic Stem Cell Lines and Their Use in International Research" |
| CG Cancer-Genetics (BioNLP-ST 2013)            | 2013 | BioC, standoff  |                                                                                                                                  |
| CHEMDNER (BioCreative Track 2)                 | 2013 | BioC / standoff |                                                                                                                                  |

|                                            |      |                     |                                                                                |
|--------------------------------------------|------|---------------------|--------------------------------------------------------------------------------|
| Chemical Patent Corpus                     | 2014 | standoff            | 200 patents                                                                    |
| CoMAGC                                     | 2013 | XML                 | 821 sentences on prostate, breast and ovarian cancer                           |
| CRAFT                                      | 2012 |                     | 97 full OA biomedical articles                                                 |
| Craven (Wisconsin corpus)                  | 1999 | other               | 1,529,731 sentences (automated)                                                |
| CTD (BioCreative IV Track 3)               |      | BioC                |                                                                                |
| DDICorpus                                  | 2011 | BioC                | 792 texts from DrugBank and 233 Medline abstracts                              |
|                                            | 2013 |                     |                                                                                |
| DIP-PPI (Database of Interaction Proteins) |      | other               | Only proteins from yeast.                                                      |
| EBI:diseases                               | 2008 | other               | 856 sentences from 624 abstracts                                               |
| eFIP                                       | 2012 | xlsx                |                                                                                |
|                                            | 2015 |                     |                                                                                |
| EMU (Extractor of Mutations)               | 2011 | other               |                                                                                |
| EU-ADR                                     | 2012 | other               | 300 PubMed abstracts (drug-disorder, drug-target, gene-disorder, SNP-disorder) |
| Exhaustive PTM (BioNLP 2011)               |      |                     |                                                                                |
| FlySlip                                    | 2007 | CONLL               | 82 abstracts, 5 full papers                                                    |
| FSU-PRGE                                   | 2010 | leXML               | 3236 MEDLINE abstracts (35,519 sentences)                                      |
| GAD                                        | 2015 | csv                 |                                                                                |
| GeneReg                                    | 2010 | BioC                | 314 Abstracts                                                                  |
| GeneTag (BioCreative II Gene Mention)      | 2005 | BioC                | 20,000 sentences MEDLINE                                                       |
| GENIA (BioNLP Shared Task 2009)            |      |                     |                                                                                |
| GENIA (BioNLP Shared Task 2011)            |      | BioC, standoff      |                                                                                |
| GENIA (term annotation)                    | 2003 | BioC, XML           |                                                                                |
| GETM                                       | 2010 | BioC, standoff      |                                                                                |
| GREC (Gene Regulation Event Corpus)        | 2009 | BioC, standoff, XML | 240 MEDLINE (167 on E.coli and 73 on Human)                                    |
| HIMERA                                     | 2016 | standoff            |                                                                                |
| HPRD50 (Human Protein Reference Database)  | 2004 | BioC                | 50 abstracts                                                                   |
| IDP4+                                      | 2017 | anndoc              | 826 abstracts/full texts                                                       |
| IEPA                                       | 2002 | BioC                | slightly over 300 MEDLINE abstracts                                            |
| iHOP                                       | 2004 | other               | ~ 160 sentences                                                                |

|                                            |      |                           |                                                                                                             |
|--------------------------------------------|------|---------------------------|-------------------------------------------------------------------------------------------------------------|
| iProLINK / RLIMS                           | 2004 | other,<br>XML, BioC       |                                                                                                             |
| iSimp                                      | 2014 | BioC                      | 130 MEDLINE abstracts<br>(1199 sentences)                                                                   |
| Linnaeus                                   | 2010 | standoff                  |                                                                                                             |
| LLL (Learning Language in Logic)           | 2005 | BioC                      |                                                                                                             |
| MEDSTRACT                                  |      | BioC                      | 199 PubMed citations                                                                                        |
| MedTag                                     | 2005 | other                     |                                                                                                             |
| Metabolite and Enzyme                      | 2011 | BioC, XML                 | 296 abstracts                                                                                               |
| miRTex                                     | 2015 | BioC,<br>standoff         | 350 abstracts (200 develop-<br>ment, 150 test)                                                              |
| MLEE                                       | 2012 | CONLL,<br>standoff        | 262 PubMed abstracts on<br>molecular mechanisms of can-<br>cer (specifically relating to an-<br>giogenesis) |
| mTOR pathway event corpus<br>(BioNLP 2011) | 2011 | standoff                  |                                                                                                             |
| MutationFinder                             | 2007 | other                     | 305 abstract (development<br>data set), 508 abstract test set                                               |
| Nagel                                      |      | XML,<br>standoff          |                                                                                                             |
| NCBI Disease                               | 2012 | other                     | 6881 sentences in 793 PubMed<br>abstracts                                                                   |
| OMM (Open Mutation Miner)                  | 2012 | other                     | 40 full texts                                                                                               |
| OSIRIS                                     | 2008 | BioC,<br>XML,<br>standoff | 105 articles                                                                                                |
| PC (Pathway Curation) (BioNLP-<br>ST 2013) | 2013 | BioC                      |                                                                                                             |
| PennBioIE-oncology                         | 2004 | leXML                     | 1414 PubMed abstracts on<br>cancer                                                                          |
| pGenN (Plant-GN)                           | 2015 | BioC                      | 104 MEDLINE abstracts                                                                                       |
| PICAD                                      | 2011 | XML                       | 1037 sentences from PubMed                                                                                  |
| PolySearch (includes v1. and v2.)          |      | other                     |                                                                                                             |
| ProteinResidue                             |      | other                     |                                                                                                             |
| SCALKlinger                                | 2008 | CONLL                     |                                                                                                             |
| SCALKolarik                                | 2008 | CONLL                     |                                                                                                             |
| SETH                                       | 2016 | standoff                  | 630 publications from The<br>American Journal of Human<br>Genetics and Human Muta-<br>tion                  |
| SH (Schwartz and Hearst)                   | 2003 | BioC                      | 1000 PubMed Abstracts                                                                                       |
| SNPCorpus                                  | 2011 | BioC                      | 296 MEDLINE abstracts                                                                                       |
| Species                                    | 2013 | standoff                  | 800 PubMed abstracts                                                                                        |
| T4SS (Type 4 Secretion System)             | 2011 | CONLL                     |                                                                                                             |

|                                     |      |       |                                          |
|-------------------------------------|------|-------|------------------------------------------|
| T4SS Event Extraction (BioNLP 2010) | 2010 | other |                                          |
| tmVar                               | 2013 | BioC  | 500 PubMed abstracts                     |
| VariomeCorpus (hvp)                 | 2013 | BioC  |                                          |
| Yapex                               | 2002 | other | 99 training, 101 test MED-LINE abstracts |

---

Table S2: Statistics for the original corpora considered for model training and testing, their respective original entity classes, total number of entities, number of unique entities, and their remapping into new entity classes.

| Corpus             | Entity Class | Entity (remapped ontology) | class by ties | Number of enti- | Number of unique entities |
|--------------------|--------------|----------------------------|---------------|-----------------|---------------------------|
| AIMED              | protein      | GeneProtein                | 4236          |                 | 1138                      |
| BioGrid            | Gene         | GeneProtein                | 6489          |                 | 1068                      |
| CellFinder         | GeneProtein  | GeneProtein                | 1750          |                 | 734                       |
| VariomeCorpus      | gene         | GeneProtein                | 4613          |                 | 453                       |
| IEPA               | Protein      | GeneProtein                | 1117          |                 | 130                       |
|                    | Gene         | GeneProtein                | 1266          |                 | 484                       |
| miRTex development | Complex      | GeneProtein                | 24            |                 | 7                         |
|                    | Family       | GeneProtein                | 57            |                 | 28                        |
|                    | Gene         | GeneProtein                | 922           |                 | 368                       |
| miRTex test        | Complex      | GeneProtein                | 32            |                 | 9                         |
|                    | Family       | GeneProtein                | 78            |                 | 31                        |
|                    | Tag          | GeneProtein                | 3             |                 | 2                         |
| mTor               | Receptor     | GeneProtein                | 1             |                 | 1                         |
|                    | Protein      | GeneProtein                | 1483          |                 | 297                       |
| OSIRIS             | Complex      | GeneProtein                | 201           |                 | 69                        |
| SETH               | gene         | GeneProtein                | 799           |                 | 260                       |
|                    | Gene         | GeneProtein                | 2315          |                 | 969                       |
| VariomeCorpus      | mutation     | Variants                   | 1690          |                 | 429                       |
| OSIRIS             | variant      | Variants                   | 551           |                 | 369                       |
| SETH               | SNP          | Variants                   | 895           |                 | 689                       |
|                    | RS           | Variants                   | 9             |                 | 3                         |
| SNPCorpus          | NSM          | Variants                   | 244           |                 | 230                       |
|                    | PSM          | Variants                   | 278           |                 | 216                       |
| tmVar test         | SNP          | Variants                   | 39            |                 | 29                        |

|             |                       |              |      |      |
|-------------|-----------------------|--------------|------|------|
| tmVar train | ProteinMutation       | Variants     | 205  | 137  |
|             | DNAMutation           | Variants     | 220  | 156  |
|             | SNP                   | Variants     | 96   | 58   |
|             | ProteinMutation       | Variants     | 440  | 254  |
|             | DNAMutation           | Variants     | 431  | 305  |
|             | MULTIPLE              | ChemicalDrug | 188  | 175  |
|             | NO CLASS              | ChemicalDrug | 32   | 15   |
|             | FAMILY                | ChemicalDrug | 4223 | 1573 |
|             | ABBREVIATION          | ChemicalDrug | 4521 | 812  |
|             | SYSTEMATIC            | ChemicalDrug | 6813 | 2756 |
|             | FORMULA               | ChemicalDrug | 4137 | 839  |
|             | IDENTIFIER            | ChemicalDrug | 639  | 240  |
|             | TRIVIAL               | ChemicalDrug | 8970 | 2268 |
|             | MULTIPLE              | ChemicalDrug | 202  | 177  |
|             | NO CLASS              | ChemicalDrug | 40   | 13   |
|             | FAMILY                | ChemicalDrug | 4086 | 1444 |
|             | ABBREVIATION          | ChemicalDrug | 4536 | 822  |
|             | SYSTEMATIC            | ChemicalDrug | 6655 | 2820 |
|             | FORMULA               | ChemicalDrug | 4448 | 840  |
|             | IDENTIFIER            | ChemicalDrug | 672  | 231  |
|             | TRIVIAL               | ChemicalDrug | 8823 | 2172 |
|             | DrugName              | ChemicalDrug | 826  | 416  |
|             | DrugName              | ChemicalDrug | 240  | 176  |
|             | Chemicals_Drugs       | ChemicalDrug | 1    | 1    |
|             | Entity                | ChemicalDrug | 2454 | 653  |
|             | Ion                   | ChemicalDrug | 5    | 2    |
|             | Simple_molecule       | ChemicalDrug | 26   | 13   |
|             | Drug                  | ChemicalDrug | 42   | 3    |
|             | MiRNA                 | RNA          | 1539 | 469  |
|             | MiRNA                 | RNA          | 1217 | 353  |
|             | MiRText - development |              |      |      |
|             | MiRText - test        |              |      |      |



---

|      |     |     |    |   |
|------|-----|-----|----|---|
| mTOR | RNA | RNA | 12 | 7 |
|------|-----|-----|----|---|

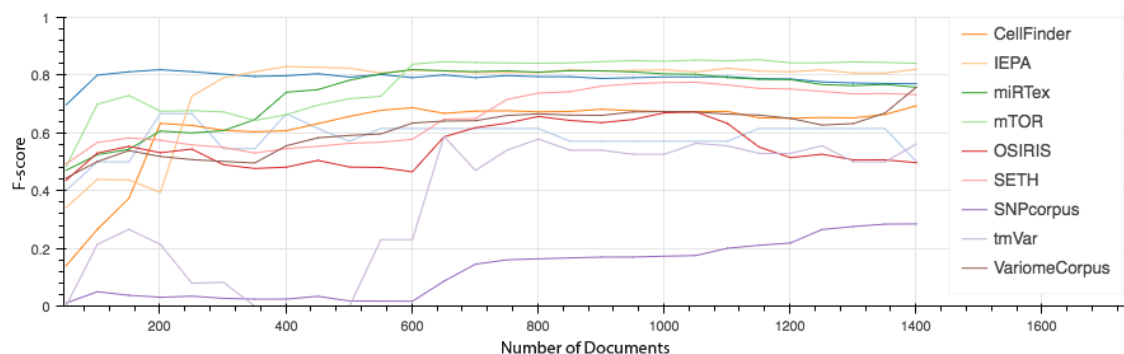

Figure S1: Raw learning curves obtained when considering genes, proteins and variants as a single superclass. Although different corpora may have differences in annotation standards for the same entities, it can be noted that the overall predictive performance of the trained models does not decrease.

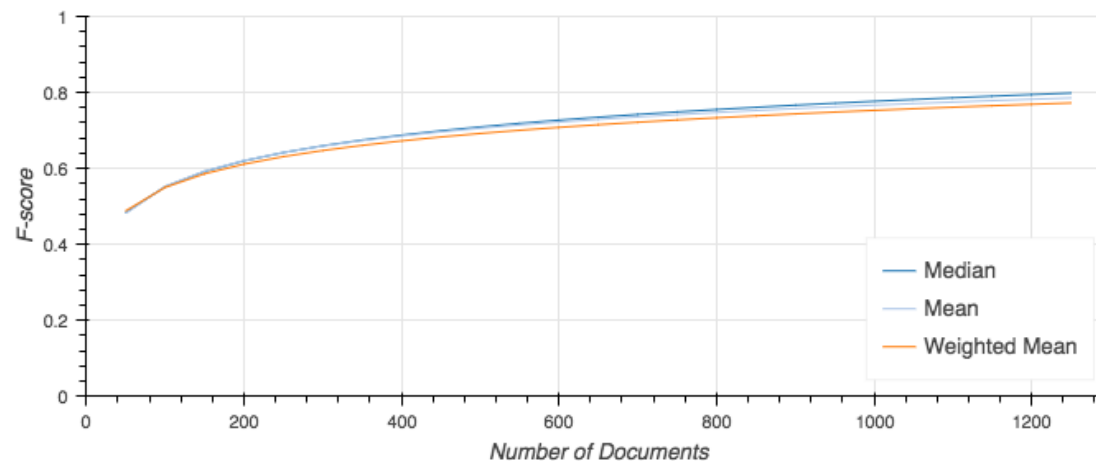

Figure S2: Average performance for the “GeneProtein” prediction when using all corpora for training. All relevant corpora were merged and split for training and testing. The average (mean, median and weighted mean aggregated F-score prediction performance for “GeneProtein” superclass entities is shown, increasing incrementally with increasing document training size.

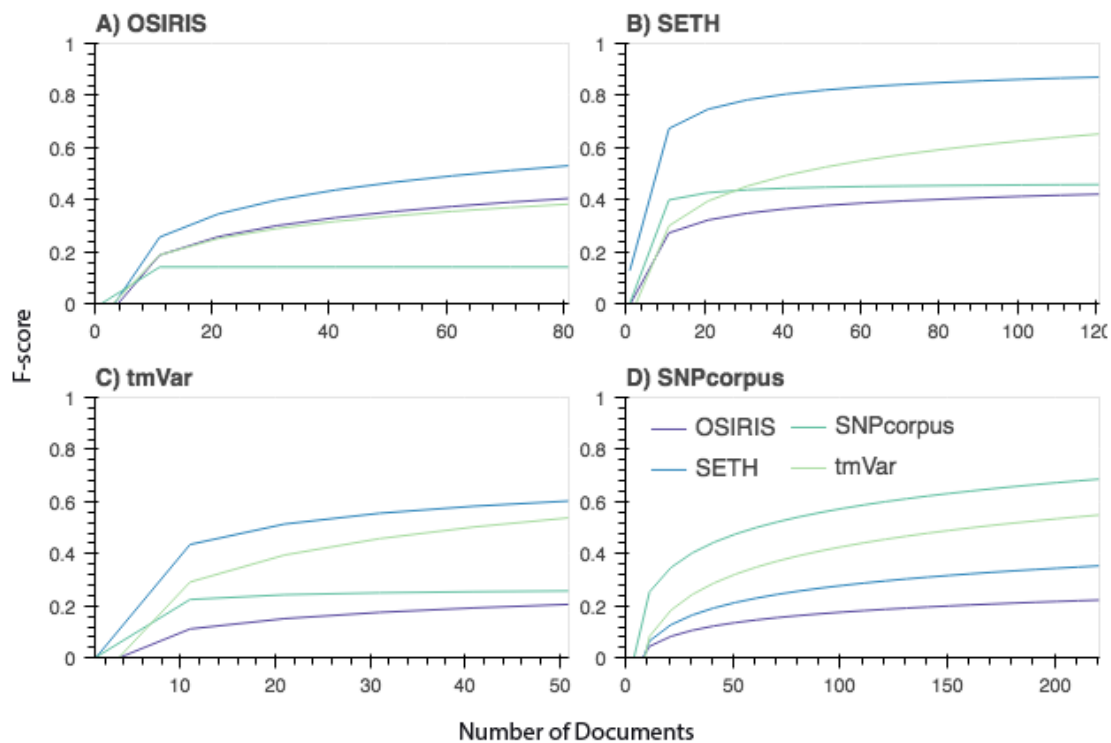

Figure S3: Corpus-specific learning curves for the "Variants" class. Learning curves for corpus-specific training and prediction of all corpora test data. A) OSIRIS; B) SETH; C) tmVar; and D) SNPcorpus

## References

- Donald C. Comeau, Rezarta Islamaj Doan, Paolo Ciccarese, Kevin Bretonnel Cohen, Martin Krallinger, Florian Leitner, Zhiyong Lu, Yifan Peng, Fabio Rinaldi, Manabu Torii, Alfonso Valencia, Karin Verspoor, Thomas C. Wiegers, Cathy H. Wu, and W. John Wilbur. Bioc: a minimalist approach to interoperability for biomedical text processing. *Database*, 2013:bat064, 2013. doi: 10.1093/database/bat064. URL <http://dx.doi.org/10.1093/database/bat064>.
- Jenny Rose Finkel, Trond Grenager, and Christopher Manning. Incorporating non-local information into information extraction systems by gibbs sampling. In *Proceedings of the 43rd Annual Meeting on Association for Computational Linguistics*, ACL '05, pages 363–370, Stroudsburg, PA, USA, 2005. Association for Computational Linguistics. doi: 10.3115/1219840.1219885. URL <https://doi.org/10.3115/1219840.1219885>.
- Vijay Krishnan and Vignesh Ganapathy. Named entity recognition, 2005.
- Hernani Marques and Fabio Rinaldi. Pybioc: a python implementation of the bioc core. In *Fourth BioCreative Challenge Evaluation Workshop*, volume 1, pages 2–4. Biocreative, October 2013. URL <http://www.zora.uzh.ch/id/eprint/91881/>.
- Antonio Jimeno Yepes, Mariana Neves, Karin Verspoor, and formats. Brat2bioc: conversion tool between brat and bioc. 2013.
